# Supplementary material for: Community Initiatives to Promote Basic Life Support Implementation—A Scoping Review
Source: MDPI journal article supplement (doi:10.3390/jcm10245719), 2021-12-07
Supplement: s1 [file s1]

## *Supplementary Material 1: Search strategy applied*

### **PubMed**

- (((("Heart Arrest"[Mesh] OR "heart arrest\*"[TIAB] OR "cardiac arrest\*"[TIAB] OR "cardiovascular arrest\*"[TIAB] OR "cardiopulmonary arrest\*"[TIAB] OR "cardio-pulmonary arrest\*"[TIAB] OR "Out-of-Hospital Cardiac Arrest\*"[Mesh] OR OHCA OR "Out of Hospital Cardiac Arrest\*"[TIAB] OR "out-of-hospital cardiac arrest\*" [TIAB] OR "Outside-of-Hospital Cardiac Arrest"[TIAB])) OR (resuscitation [Mesh] OR resuscitation\* [TIAB] OR "cardiopulmonary resuscitation"[Mesh] OR "cardiopulmonary resuscitation"[TIAB] OR "Cardio-Pulmonary Resuscitation" OR "Cardio Pulmonary Resuscitation" OR CPR [TIAB] OR "Life Support Care"[Mesh] OR "Basic Cardiac Life Support" OR "basic life support" OR "Cardiac Life Support" [TIAB] OR "cardiorespiratory resuscitation"[TIAB] OR "Heart Massage\*"[Mesh] OR "heart massage\*"[TIAB] OR "cardiac massage\*" [TIAB] OR "chest compression\*" [TIAB] OR "cardiac compression\*" [TIAB])) OR (defibrillators [Mesh] OR defibrillator\* [TIAB] OR "automated external defibrillator\*" OR AED OR "External Defibrillator\*" OR "Electric Shock Cardiac Stimulator\*" OR "Electric Defibrillation" OR Electric Countershock [Mesh] OR "Electrical Cardioversion\*" [TIAB] OR "Cardiac Electroversion\*"))AND (bystander\*[TIAB] OR "first responder\*"[TIAB] OR "first-responder\*"[TIAB] OR Layperson\*[TIAB] OR "lay people"[TIAB] OR "lay rescuer\*"[TIAB] OR "lay public" OR witness\*[TIAB] OR "non-healthcare professional" [TIAB] )) AND (((community OR public OR local OR social OR population\* OR citizen\*) AND (initiative\* OR intervention\* OR action\* OR participation OR involvement\* OR engagement OR preparation\* OR implement\* OR project\* OR strategy\* OR program OR programs OR network\* OR training\* OR campaign\* OR education OR coaching OR information\* OR learning OR instruction\* OR guidance\* OR response\* OR responsiveness OR reply OR reaction OR awareness OR alertness OR realization OR sensibility OR sensitivity

OR consciousness) OR “community-based initiative\*” OR “community-driven initiative\*”))

- Search performed on 01/02/2021
- Filters: Only humans

## EMBASE

- (((('heart arrest' OR 'cardiac arrest\*' OR 'cardiovascular arrest\*' OR 'cardiopulmonary arrest\*' OR 'cardio-pulmonary arrest' OR 'out of hospital cardiac arrest' OR ohca OR 'out-of-hospital cardiac arrest\*' OR 'outside-of-hospital cardiac arrest') OR ('heart massage OR 'cardiopulmonary resuscitation' OR 'cardio-pulmonary resuscitation' OR 'cardio pulmonary resuscitation' OR cpr OR 'basic life support' OR 'cardiorespiratory resuscitation' OR 'heart massage\*' OR 'cardiac massage\*' OR 'chest compression\*' OR 'cardiac compression\*' OR defibrillator\* OR “automated external defibrillator\*” OR AED OR “External Defibrillator\*” OR “Electric Shock Cardiac Stimulator\*” OR “Electric Defibrillation” OR Electric Countershock OR “Electrical Cardioversion\*” OR “Cardiac Electroversion\*”)) AND ('layperson' OR bystander\* OR 'first responder\*' OR 'first-responder\*' OR layperson\* OR 'lay people' OR 'lay rescuer\*' OR 'lay public' OR witness\* OR 'non-healthcare professional')) AND ((community OR public OR population\* OR citizen\*) AND (initiative\* OR intervention\* OR action\* OR participation OR involvement\* OR engagement OR implement\* OR program OR programs OR network\* OR training\* OR campaign\* OR guidance\* OR response\* OR responsiveness OR reply OR awareness OR alertness OR sensibility OR sensitivity OR consciousness OR 'community-based initiative\*' OR 'community-driven initiative\*’)))
- Search performed on 01/02/2021
- No filters

## COCHRANE

- (MeSH descriptor: [Heart Arrest] OR ("cardiac arrest" OR "cardiovascular arrest\*" OR "cardiopulmonary arrest\*" OR "cardio-pulmonary arrest\*"):ti,ab,kw OR MeSH descriptor: [Out-of-Hospital Cardiac Arrest] OR ("cardiopulmonary resuscitation" OR "Cardio Pulmonary Resuscitation" OR CPR OR "Life Support Care" OR "Basic Cardiac Life Support" OR "basic life support" OR "Cardiac Life Support" OR "cardiorespiratory resuscitation"):ti,ab,kw OR MeSH descriptor: [Heart Massage] OR ("cardiac massage\*" OR "chest compression\*" OR "cardiac compression"):ti,ab,kw OR defibrillator\* OR “automated external defibrillator\*” OR AED OR “External Defibrillator\*” OR “Electric Shock Cardiac Stimulator\*” OR “Electric Defibrillation” OR Electric Countershock OR “Electrical Cardioversion\*” OR “Cardiac Electroversion\*”:ti,ab,kw) AND ((bystander\* OR "first responder\*" OR "first-responder\*" OR Layperson\* OR “lay people” OR “lay rescuer\*” OR “lay public” OR witness\* OR “non-healthcare professional”):ti,ab,kw) AND (community OR public OR local OR social OR population\* OR citizen\* OR person OR people):ti,ab,kw AND (initiative\* OR intervention\* OR action\* OR participation OR involvement\* OR engagement OR preparation\* OR implement\* OR project\* OR strategy\* OR program OR programs OR network\* OR training\* OR campaign\* OR education OR coaching OR information\* OR learning OR instruction\* OR guidance\* OR response\* OR responsiveness OR reply OR reaction OR awareness OR alertness OR realization OR sensibility OR sensitivity OR consciousness OR “community-based initiative\*” OR “community-driven initiative\*”:ti,ab,kw)
- Search performed on 01/02/2021
- No filters
